# Supplementary material for: Interconnected multi-well device with three-dimensional shaker–driven culture medium circulation for use as a multi-organ microphysiological system
Source: Research Square preprint supplement (doi:10.21203/rs.3.rs-6713236/v1), 2025-06-13
Supplement: Supplementary file 1 [file 37fa5a509e627bf8043c3be3.docx]

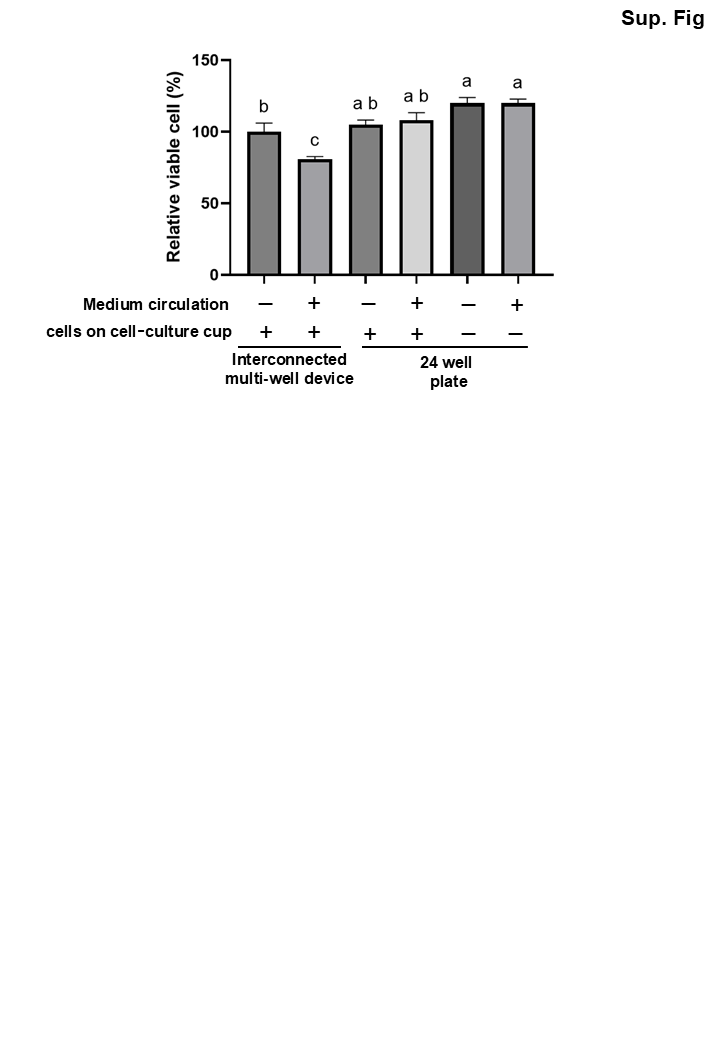


**Supplemental Fig. 1 Effects of circulation and culture environment on cell viability**

Quantification of viable human colon cancer HCT-116 cells after 24 h of pre-culture followed by 72 h under various culture conditions. Cell counts are compared with that in the cell-culture cup without medium circulation. Data are presented as means ± SE (n = 4). Different letters indicate statistically significant differences (*P* < 0.05)
