# Supplementary material for: Interconnected multi-well device with three-dimensional shaker–driven culture medium circulation for use as a multi-organ microphysiological system
Source: Research Square preprint supplement (doi:10.21203/rs.3.rs-6713236/v1), 2025-06-13
Supplement: Supplementary file 2 [file 4444948f0ba47915091031fb.docx]

**Supplemental Movie 1 Individual culture phase**

Demonstration of the individual culture methodology. The video illustrates the insertion process of cell-culture cups into standard 24-well plates (0:00-0:25) followed by independent cultivation of cell-culture cups (0:25-0:36).

**Supplemental Movie 2 Cell interaction phase**

Visualization of the cell interaction culture setup. The first sequence shows the insertion of cell-culture cups into interconnected wells (0:00-0:17), followed by cultivation of cell-culture cups within the interconnected well system (0:17-0:34).

**Supplemental Movie 3 Circulating culture methodology**

Overview of the circulating culture system. The initial segment displays a plate containing 6 fully assembled devices (0:00-0:32), while the latter segment presents the 3D shaker apparatus used for circulating culture (0:32-0:40).

**Supplemental Movie 4 Circulation of culture medium (2.5 mL)**

Interconnected wells containing phosphate-buffered saline (2.3 mL) were treated with Gardenia Blue solution (0.2 mL).

**Supplemental Movie 5 Circulation of culture medium (1.5 mL)**

Interconnected wells containing phosphate-buffered saline (1.3 mL) were treated with Gardenia Blue solution (0.2 mL).
